# Supplementary material for: The impact of clinical symptoms and endoscopic and histologic disease activity on health-related quality of life in patients with ulcerative colitis following treatment with multimatrix mesalazine
Source: Springer Nature journal article supplement (doi:10.1007/s11136-021-02787-4), 2021-03-02
Supplement: MOESM1 [file 18922618]

## Online Resource

### *Quality of Life Research*

#### **The Impact of Clinical Symptoms and Endoscopic and Histologic Disease Activity on Health-related Quality of Life in Patients with Ulcerative Colitis Following Treatment with Multimatrix Mesalazine**

Aaron Yarlas, PhD\*, Mary Kaye Willian, DrPH, Arpita Nag, PhD

\*QualityMetric, Johnston, RI, USA; Email: [ayarlas@qualitymetric.com](mailto:ayarlas@qualitymetric.com).

#### **Supplemental Methods**

##### *Assessments*

##### Health-related quality of life

Patients' HRQoL was assessed using both a disease-specific measure and a generic measure. The disease-specific measure was the Short Inflammatory Bowel Disease Questionnaire (SIBDQ) [45]. The SIBDQ comprises the 10 items that best explained variability in scores from the 32 items on the original IBDQ questionnaire [46]. The SIBDQ assesses, over the previous 2-week period, the frequency and severity of the impact of patients' UC on 4 domains of their health and functioning: bowel symptoms (problems with passing gas, abdominal pain, and stool urgency), systemic symptoms (fatigue and problems maintaining weight), emotional function (feelings of depression, tension, and anger), and social function (interference with social engagements and leisure activities). Each item is scored on a 7-point Likert-type scale, with values of 1 to 7. Domains are calculated as the sum of item scores, while a total score (range: 0 to 70) is calculated as the sum of all 10 items. For all domain scores and total score, higher scores reflect better quality of life. The SIBDQ has demonstrated good psychometric properties when used with UC patients [45, 47].

Patients' generic HRQoL was measured using the SF-12v2<sup>®</sup> Health Survey (SF-12v2) [48]. The 12 items of the SF-12v2, which has a 4-week recall period, assess 8 domains of patients' functioning and well-being: physical

functioning (PF), role limitations due to physical health problems (RP), bodily pain (BP), perception of general health (GH), vitality (VT), social functioning (SF), role limitations due to emotional health problems (RE), and mental health (MH). Each domain score is standardized into a *T*-score, with a mean of 50 and a standard deviation (SD) of 10 [48]. Weighted combinations of domain scores are used to derive *T*-scores for summaries of physical well-being (physical component score [PCS]) and mental well-being (mental component score [MCS]). For all domain scores and summary scores, higher scores reflect better quality of life.

Supplemental Table 1. List of Independent Ethics Committees or Institutions Review Boards.

| <b>IEC or IRB</b>                                   | <b>Name of Committee Chair</b> |
|-----------------------------------------------------|--------------------------------|
| Imelda vzw Commissie Medische Ethiek                | Marc Lambrechts                |
| Central IRB Services                                | Jean Mitchell                  |
| Multicentric Ethics Committee FN Hradec Kralove     | Jiri Vortel                    |
| Comité de Protection des Personnes Sud-Est VI       | Jean-Etienne BAZIN, Préside    |
| Medical Faculty Ethics Committee                    | Wolfgang Poser                 |
| MRC-ECCP                                            | Zsuzsanna Fürst                |
| Beaumont Research Ethics Committee                  | Gillian Vale                   |
| NEC Comisia Nationala de Etica                      | Sava Dumitrescu                |
| Ethics Council of Ministry of H/care & Social Dev   | M.A. Sheveleva                 |
| CEIC Hospital Universitario La Princesa             | Cecilia López                  |
| National Research Ethics Service                    | Martin Hewitt                  |
| Nottingham Research Ethics Committee 2              | Linda Rose                     |
| Schulman Associates IRB                             | Laura Hall                     |
| Central IRB Services                                | Jean Mitchell                  |
| Medische Ethische CommissieH.-Hartziekenhuis Roesse | L. Marcelis                    |
| Ethisch Comité AZ Groeninge                         | Lysebeth Luc                   |
| Comité de Ética em Pesquisa em Seres Humanos Do HC  | Renato Tambara Filho           |
| CE em Pesquisa Clínica do Hospital Mae de Deus PoA  |                                |
| Comité d'Ethique Hospital St-Sacrement              | Ana Marin                      |
| Faculty of Health Sciences Research Ethics Board    | Suzette Slama                  |
| Comité de Ética en Investigación Clínica Las Ameri. | Rodrigo Diaz Calle             |
| Comité de Ética en Investigación en el área de la.  | Gloria Visbal Illera           |
| Comité de Investigaciones y Ética en Investigacion  | Tatiana Lopez                  |
| Comité de Ética de la Investigación Riesgo de Frac  | Nelson F. Castañeda Alarco     |
| Etická Komise Nemocnice Tábor, a.s                  | Kamil Klenha                   |
| Etická Komise pri Orlickoústecké Nemocnici, a.s.    | Miroslav Kares                 |
| Etická Komise Klinického Centra ISCARE              | Vaclava Vodickova              |
| Etická Komise Nemocnice Jablonec nad Nisou          | Ota Feldman                    |
| Etická Komise – Krajská Zdravotní, a.s. - Masaryk   | Jirí Král                      |
| Etická Komise IKEM a FTNsP                          | Vladimir Stanek                |
| Lokální Etická Komise FN a LF UK v Plzni            | Otto Mayer                     |
| Etická Komise Nemocnice České Budejovice            | Frantisek Vorel                |
| Ethik-Kommission der Georg-August Universität Gött  | W. Poser                       |
| Ethikkommission der MHH                             | W. Poser                       |
| Central India Medical Research Ethics Committee     | S.M. Patil                     |
| Ethics Committee                                    | D. Bhagabati                   |
| S.K. Kalla Memorial Ethical Committee for Human Res | B.K. Tiwari                    |
| Ethics Committee                                    | B.G. Sahasrabuddhe             |
| Independent Ethics Committee                        | Bupendra Shah                  |
| Institutional Ethics Committee                      | K. Surya Rao                   |
| Sanjeevani Ethics Committee                         | Ramesh Roop Rai                |
| Ethics Committee                                    | C.S. Bhaskaran                 |

| <b>IEC or IRB</b>                                   | <b>Name of Committee Chair</b> |
|-----------------------------------------------------|--------------------------------|
| Institutional Ethics Committee (DTEC)               | Tej K. Kaul                    |
| Ethics Committee of Poona Hospital & Research Cent. | Neena Luthra                   |
| Institutional Ethics Committee                      | Padmaja Udayakumar             |
| Institutional Ethics Committee                      | U.C. Chaturvedi                |
| SREE Gokulam Medical College and Research Found.    | Sudheendra Ghosh               |
| Komisja Bioetyczna przy Okregowej Izbie Lekarskiej  | Jerzy Umiastowski              |
| Pharma Ethics (Pty) Ltd                             | Marzelle Haskins               |
| EC Hospital Universitario Dr. Peset                 | Genoveva Pallares Sancho-Tello |
| EC Hospital Universitario Ramón y Cajal             | Yolanda Solsano                |
| The VA Long Beach Healthcare System IRB             | Kathleen Herron                |
| Institutional Review Board – University of Chicago  | Christopher Daugherty          |
| Mayo Clinic Institutional Review Board              | Joseph K. Lobl                 |

IEC, Independent Ethics Committee; IRB, Institutional Review Board.

Supplemental Table 2. Coding for component scores of the modified Ulcerative Colitis Disease Activity Index (UC-DAI) administered in the MOMENTUM trial.

| <b>Description</b>                                                                                                         | <b>Component score</b> |
|----------------------------------------------------------------------------------------------------------------------------|------------------------|
| <b><u>Stool frequency</u></b>                                                                                              |                        |
| Normal                                                                                                                     | 0                      |
| 1-2 more than normal/day                                                                                                   | 1                      |
| 3-4 more than normal/day                                                                                                   | 2                      |
| >4 more than normal/day                                                                                                    | 3                      |
| <b><u>Rectal bleeding (most severe bleeding of the day)</u></b>                                                            |                        |
| None                                                                                                                       | 0                      |
| Streaks of blood                                                                                                           | 1                      |
| Obvious blood                                                                                                              | 2                      |
| Mostly blood                                                                                                               | 3                      |
| <b><u>Mucosal appearance (endoscopy score)</u></b>                                                                         |                        |
| Normal (intact vascular pattern, no friability or granulation)                                                             | 0                      |
| Mild (erythema, decreased vascular pattern, minimal granularity)                                                           | 1                      |
| Moderate (marked erythema, granularity, friability, absent vascular pattern, bleeding with minimal trauma, no ulcerations) | 2                      |
| Severe (ulceration, spontaneous bleeding)                                                                                  | 3                      |
| <b><u>Physician's Global Assessment</u></b>                                                                                |                        |
| No active disease                                                                                                          | 0                      |
| Mild disease                                                                                                               | 1                      |
| Moderate disease                                                                                                           | 2                      |
| Severe disease                                                                                                             | 3                      |

Supplemental Table 3. Scoring key for transformed ordinal Geboes score (TOGS).

| <b>Grade</b>                                    | <b>Description</b>                                    | <b>Ordinal score</b> |
|-------------------------------------------------|-------------------------------------------------------|----------------------|
| <b><u>Structural (architectural change)</u></b> |                                                       |                      |
| 0                                               | No abnormality                                        | 0                    |
| 0.1                                             | Mild abnormality                                      | 0                    |
| 0.2                                             | Mild or moderate diffuse or multifocal abnormalities  | 0                    |
| 0.3                                             | Severe diffuse or multifocal abnormalities            | 0                    |
| <b><u>Chronic inflammatory infiltrate</u></b>   |                                                       |                      |
| 1                                               | No increase                                           | 0                    |
| 1.1                                             | Mild but unequivocal increase                         | 0                    |
| 1.2                                             | Moderate increase                                     | 0                    |
| 1.3                                             | Marked increase                                       | 0                    |
| <b><u>Lamina propria eosinophils</u></b>        |                                                       |                      |
| 2A.0                                            | No increase                                           | 0                    |
| 2A.1                                            | Mild but unequivocal increase                         | 0                    |
| 2A.2                                            | Moderate increase                                     | 0                    |
| 2A.3                                            | Marked increase                                       | 0                    |
| <b><u>Lamina propria neutrophils</u></b>        |                                                       |                      |
| 2B.0                                            | No increase                                           | 0                    |
| 2B.1                                            | Mild but unequivocal increase                         | 1                    |
| 2B.2                                            | Moderate increase                                     | 2                    |
| 2B.3                                            | Marked increase                                       | 3                    |
| <b><u>Neutrophils in epithelium</u></b>         |                                                       |                      |
| 3                                               | None                                                  | 0                    |
| 3.1                                             | <5% crypt involved                                    | 1                    |
| 3.2                                             | <50% crypt involved                                   | 2                    |
| 3.3                                             | >50% crypt involved                                   | 3                    |
| <b><u>Crypt destruction</u></b>                 |                                                       |                      |
| 4                                               | None                                                  | 0                    |
| 4.1                                             | Probable-local excess of neutrophils in part of crypt | 1                    |
| 4.2                                             | Probable-marked attenuation                           | 2                    |
| 4.3                                             | Unequivocal crypt destruction                         | 3                    |
| <b><u>Erosion or ulceration</u></b>             |                                                       |                      |
| 5                                               | No erosion, ulceration or granulation tissue          | 0                    |
| 5.1                                             | Recovering epithelium plus adjacent inflammation      | 1                    |
| 5.2                                             | Probable erosion-focally stripped                     | 2                    |
| 5.3                                             | Unequivocal erosion                                   | 3                    |
| 5.4                                             | Ulcer or granulation tissue                           | 4                    |
